# Supplementary material
Source: publisher site journal article supplement (https://www.dovepress.com/get_supplementary_file.php?f=387582.xlsx)
Supplement: Supplementary file 1 [file get_supplementary_file.php]

## Sheet: Sheet1
name	Number of lesion	BMI	gender	marriage	education	hypertension	diabetes	smoking	drinking	age	Gensini	Lymphocyte	Monocyte	Neutrophil	Platelet	NLR	Depression	HAMD score
###	1	22.03	female	married	below	Yes	No	No	No	65	24	0.64	0.28	2.89	137	4.52	1	25
###	1	22.58	male	married	below	No	Yes	Yes	Yes	49	20	1.93	0.46	3.02	69	1.56	0	6
###	2	20.96	male	married	high school	Yes	No	Yes	No	57	83	1.11	0.35	2.44	164	2.2	1	24
###	2	17.01	male	married	below	Yes	No	Yes	Yes	72	82	1.16	0.43	3.81	178	3.28	1	21
###	2	20.12	male	married	high school	No	No	No	No	70	46	1.85	0.33	3.64	199	1.97	0	11
###	1	16.41	female	married	below	Yes	No	No	No	62	40	1.69	0.2	2.57	100	1.52	0	12
###	1	22.04	male	married	below	No	No	Yes	Yes	57	87	2.33	0.54	4.55	132	1.95	0	6
###	1	18.75	male	married	below	No	No	Yes	Yes	72	97	1.56	0.62	4.36	285	2.79	0	8
###	3	22.5	female	married	below	No	No	No	No	75	74	1.14	0.29	8.39	325	7.36	1	24
###	2	27.12	male	married	below	Yes	No	Yes	Yes	46	112	1.58	0.64	9.48	241	6	1	26
###	3	25.25	male	married	below	Yes	No	Yes	Yes	74	42	1.32	0.4	5.82	220	4.41	0	13
###	1	25.34	male	married	high school	No	No	Yes	Yes	43	35	4.17	0.68	7.31	175	1.75	1	24
###	3	28.81	male	married	above	Yes	No	Yes	Yes	80	67	1.47	0.54	4.62	206	3.14	0	15
###	1	23.6	male	married	above	No	No	No	Yes	51	25	3.08	0.4	4.48	220	1.45	0	9
###	1	22.03	female	married	high school	Yes	No	No	No	62	56	1.2	0.35	9.68	285	8.07	1	30
###	2	23.53	male	married	below	Yes	Yes	No	No	70	36	0.71	0.11	1.44	116	2.03	0	10
###	3	24.59	male	married	high school	Yes	No	Yes	No	67	68	1.39	0.38	3.88	138	2.79	0	6
###	3	19.96	female	married	below	Yes	No	No	No	71	92	0.68	0.11	6.97	76	10.25	1	23
###	3	28.37	female	married	below	Yes	No	No	No	64	48	1.53	0.47	3	191	1.96	1	25
###	3	21.63	male	married	below	Yes	Yes	Yes	No	75	67	2.04	0.58	7.24	132	3.55	1	22
###	3	26.12	male	married	below	Yes	Yes	Yes	Yes	68	66	0.99	0.66	5.73	180	5.79	1	24
###	1	27.43	male	married	below	Yes	No	Yes	Yes	73	30	0.54	0.09	6.53	120	12.09	0	7
###	3	22.59	male	married	below	Yes	No	Yes	Yes	69	94	0.76	0.26	7.35	144	9.67	1	23
###	3	19.29	male	married	below	No	Yes	Yes	No	70	54	1.59	0.72	3.82	238	2.4	0	4
###	1	23.39	female	married	below	No	No	No	No	64	21	0.97	0.36	6.24	262	6.43	0	17
###	3	20.9	male	married	below	Yes	No	Yes	No	66	62	1.02	0.31	10.23	159	10.03	1	23
###	1	20.2	female	married	below	Yes	Yes	No	No	71	32	1.37	0.4	4.53	242	3.31	0	5
###	2	19.14	female	married	below	No	Yes	Yes	No	71	34	1.42	0.36	3.42	154	2.41	0	4
###	2	21.09	female	unmarried, divorced and widowed	high school	Yes	No	Yes	Yes	63	32	1.12	0.31	3.6	171	3.21	0	9
###	2	20.32	male	unmarried, divorced and widowed	below	Yes	No	Yes	Yes	76	38	0.72	0.2	2.34	196	3.25	1	28
###	1	17.58	male	married	high school	Yes	No	Yes	Yes	52	21	0.81	0.2	1.67	154	2.06	0	5
###	3	22.59	female	married	high school	Yes	No	No	No	57	132	1.97	0.33	2.35	177	1.19	1	21
###	3	22.49	male	married	high school	Yes	No	Yes	No	57	192	5.59	0.64	7.84	231	6.87	1	24
###	1	22.67	male	married	above	No	No	No	No	50	30	1.93	0.49	2.16	364	1.12	0	7
###	3	18.83	female	unmarried, divorced and widowed	below	Yes	No	No	No	81	43	1.87	0.41	3.7	420	1.98	1	25
###	2	24.22	male	married	below	Yes	No	Yes	Yes	63	54	2.44	0.36	7	221	2.87	0	14
###	3	19.38	female	married	below	Yes	Yes	No	No	76	33	1.23	0.19	1.83	142	1.49	0	7
###	2	19.59	male	married	below	Yes	No	Yes	Yes	51	51	1.9	0.39	3.24	207	1.71	0	6
###	2	22.68	male	married	below	No	No	Yes	No	63	36	1.27	0.4	2.23	144	1.76	0	3
###	3	19.57	male	married	above	No	No	Yes	Yes	38	104	1.04	0.35	5.31	217	5.11	1	26
###	2	19.72	male	married	below	No	No	No	Yes	59	40	1.48	0.34	4.2	224	2.84	0	8
###	2	20.43	male	married	below	No	Yes	No	No	67	90	2.44	0.38	5.01	222	2.05	0	13
###	2	22.31	male	married	below	Yes	No	Yes	Yes	68	20	2.53	0.31	3.59	166	1.42	0	8
###	3	27.01	male	unmarried, divorced and widowed	below	No	Yes	Yes	No	53	97	2.12	0.49	7.75	244	3.66	0	4
###	2	21.47	female	unmarried, divorced and widowed	below	Yes	No	No	No	69	24	0.83	0.48	3.61	352	4.35	1	26
###	2	26.45	male	married	below	Yes	No	Yes	Yes	49	38	2.38	0.48	2.9	230	1.22	0	4
###	1	17.9	male	married	below	No	Yes	No	No	70	16	0.74	0.21	4.03	165	5.45	0	18
###	1	22.92	female	married	below	Yes	No	No	No	69	28.5	0.82	0.14	1.57	148	1.91	1	24
###	3	26.22	male	married	below	No	No	Yes	No	66	61	1.24	0.61	4.32	246	3.48	1	20
###	2	25.88	male	married	high school	Yes	No	No	Yes	57	38	1.21	0.28	5.07	177	4.19	0	16
###	3	23.11	male	married	below	No	No	Yes	No	73	57	1.05	0.27	2.88	158	2.74	0	10
###	2	20.86	female	married	below	Yes	Yes	No	No	75	38	1	0.25	3.46	166	3.46	1	20
###	1	17.02	male	married	high school	Yes	No	No	Yes	55	17	1.18	0.34	4.66	242	3.95	1	26
###	3	21.85	female	married	below	No	Yes	No	No	74	73	0.27	0.18	9.97	183	36.93	1	28
###	3	24.44	male	married	high school	No	No	Yes	No	67	97	1.65	0.39	7.04	228	4.27	0	4
###	2	23.38	male	unmarried, divorced and widowed	above	No	No	Yes	No	47	43	2.97	0.5	6.39	215	2.15	0	9
###	2	23.11	female	married	below	No	No	No	No	65	65	1.75	0.28	3.14	162	1.79	0	8
###	1	24.22	female	unmarried, divorced and widowed	below	Yes	Yes	Yes	Yes	78	11	1.45	0.41	2.83	172	1.95	0	12
###	2	16.02	male	married	below	No	Yes	Yes	Yes	65	56	0.79	0.24	5.32	155	6.73	0	13
###	2	19.47	male	married	below	No	No	Yes	Yes	54	90.5	3.23	0.45	3.44	160	1.07	0	5
###	1	24.44	male	married	high school	Yes	No	Yes	Yes	40	42	1.68	0.54	4.3	191	2.56	0	9
###	2	22.96	female	married	below	Yes	Yes	No	No	57	58	1.7	0.38	3.09	165	1.82	0	16
###	3	25.56	male	married	high school	Yes	No	Yes	No	71	58	2.5	0.56	4.64	156	1.86	0	8
###	3	23.53	male	married	high school	No	No	Yes	No	58	77	1.2	0.3	1.68	133	1.4	0	10
###	1	19.53	male	married	below	No	No	Yes	Yes	65	21	0.99	0.28	2.89	182	2.92	0	5
###	3	23.89	female	married	high school	Yes	No	No	No	63	52	1.54	0.35	6.75	130	4.38	1	26
###	1	17.78	female	married	below	No	No	No	No	57	45	2.04	0.4	7.07	185	3.47	0	7
###	2	20.05	female	unmarried, divorced and widowed	below	Yes	No	No	No	69	40	0.5	0.28	5.36	189	10.72	1	23
###	3	24.57	male	married	high school	Yes	No	Yes	Yes	68	98	1.46	0.5	6.1	214	4.18	0	16
###	1	20	female	unmarried, divorced and widowed	below	Yes	No	No	No	52	16	1.22	0.47	6.15	404	5.04	0	11
###	2	19.22	male	married	high school	Yes	Yes	Yes	No	66	47	1.19	0.5	3.72	178	3.13	0	14
###	3	22.07	female	married	below	Yes	Yes	No	No	74	83	1.54	0.59	10.86	327	7.05	1	24
###	2	25.65	male	married	high school	No	No	Yes	Yes	65	61	1.46	0.46	9.61	157	6.58	0	5
###	2	17.58	male	married	below	No	No	No	No	46	55	1.05	0.3	10.59	275	10.09	0	11
###	1	27.18	male	married	high school	Yes	Yes	No	Yes	39	87	2.82	0.63	7.44	269	2.64	0	13
###	1	22.41	female	married	below	Yes	Yes	No	No	63	22	1.4	0.31	3.34	181	2.39	0	8
###	1	20.4	male	married	below	No	No	Yes	Yes	50	16	1.27	0.41	4.69	337	3.69	0	14
###	1	18.11	male	married	below	Yes	Yes	No	Yes	69	33.5	4.68	0.53	2.95	161	0.63	0	4
###	3	27.34	male	married	below	Yes	Yes	Yes	Yes	68	98	2.36	0.46	6.65	288	2.82	0	12
###	3	39.28	male	married	below	No	No	Yes	Yes	53	80	0.52	0.23	8.48	228	16.31	0	13
###	2	21.11	male	married	below	Yes	No	No	Yes	62	36.5	0.83	0.21	3.27	107	3.94	1	26
###	3	21.45	female	married	below	No	No	No	No	73	121	1.27	0.27	6.11	150	4.81	1	28
###	1	24.09	male	married	below	No	No	Yes	Yes	49	32	0.87	0.34	6.39	236	7.34	0	13
###	2	19.76	female	married	below	Yes	No	No	No	58	28	1.99	0.38	2.8	181	1.41	0	9
###	1	22.35	female	married	below	No	No	Yes	No	80	61	1.36	0.3	6.56	302	4.82	1	21
###	3	22.58	male	married	below	Yes	No	Yes	Yes	70	52	1.59	0.27	2.56	185	1.61	0	10
###	1	20.94	female	married	below	No	No	Yes	No	55	20	1.98	0.51	4.43	325	2.24	0	7
###	3	31.64	male	married	below	No	No	Yes	Yes	68	54	0.66	0.22	7.83	159	11.86	0	9
###	2	19.48	male	married	below	Yes	No	Yes	No	69	62	0.66	0.19	7.64	177	11.58	1	26
###	3	22	male	married	below	Yes	No	Yes	No	64	28	2.04	0.51	4.18	157	2.05	0	13
###	3	19.47	male	married	high school	No	No	Yes	Yes	38	54	5.6	0.45	7.85	292	1.4	0	9
###	1	17.65	male	married	below	Yes	No	No	No	67	11	0.69	0.16	3.79	181	5.49	0	16
###	1	18.13	male	married	below	No	No	Yes	Yes	57	29	1.26	0.41	3.24	131	2.57	0	8
###	2	24.73	male	married	below	No	No	Yes	Yes	51	57	1.61	0.34	4.58	249	2.84	0	8
###	3	22.86	male	unmarried, divorced and widowed	below	No	No	No	No	69	76	1.36	0.55	6.11	231	4.49	1	25
###	1	27.43	male	married	below	No	No	No	No	71	24	0.83	0.15	2.41	110	2.9	0	6
###	3	22.15	male	married	below	Yes	No	No	No	71	76	2.44	0.35	2.29	176	0.94	0	12
###	2	22.19	male	married	below	No	No	Yes	Yes	73	102	3.32	0.42	3.17	152	0.95	0	3
###	1	22.19	male	married	below	No	No	No	No	62	46	0.71	0.46	10.65	170	15	0	7
###	1	22.48	male	married	above	No	No	Yes	Yes	46	83	1.81	0.3	3.84	217	2.12	0	4
###	3	21.3	male	married	high school	No	No	No	No	67	37	0.89	0.21	2.32	120	2.61	0	6
###	3	22.67	male	married	below	Yes	No	No	No	66	65	1.22	0.58	5.3	140	4.34	1	20
###	1	22.27	female	married	below	Yes	Yes	No	No	66	16	1.01	0.36	2.54	212	2.51	0	11
###	2	29.38	male	married	below	Yes	No	Yes	No	51	36	0.96	0.19	3.53	78	3.68	0	14
###	2	19.35	female	married	below	No	No	Yes	Yes	55	40	2.67	0.43	5.83	309	2.18	0	8
###	3	22.68	female	married	below	Yes	Yes	No	No	63	48	2.04	0.28	2.57	172	1.26	0	9
###	2	19.84	male	unmarried, divorced and widowed	below	No	Yes	Yes	No	45	42	1.34	0.89	8.11	132	6.05	0	17
###	3	23.16	male	married	below	Yes	No	No	No	52	66	1.64	0.4	8.32	315	5.07	0	11
###	1	19.13	male	married	high school	Yes	No	Yes	Yes	61	35	1.8	0.27	5.68	266	3.16	0	13
###	2	18.65	male	married	high school	No	No	No	No	48	84.5	3.88	0.33	4.38	303	1.13	0	11
###	3	22.89	male	married	below	No	Yes	No	No	52	68	1	0.3	5.09	186	5.09	0	15
###	2	14.84	female	married	high school	Yes	No	No	No	58	45	1.5	0.22	3.34	98	2.23	0	6
###	1	18.05	female	married	below	Yes	Yes	No	No	57	42	1.35	0.63	7.63	220	5.65	1	24
###	1	20.34	male	married	below	Yes	No	Yes	No	51	18	1.62	0.29	4.5	151	2.78	0	6
###	2	30.08	male	married	below	Yes	No	Yes	Yes	57	63	6.81	0.63	7.81	220	1.15	0	6
###	1	29.75	female	married	below	Yes	No	No	No	69	15	1.15	0.2	2.41	215	2.1	0	16
###	3	16.85	male	married	below	Yes	Yes	Yes	Yes	56	62	1.93	0.48	5.46	149	2.83	1	27
###	2	19.31	male	married	below	No	No	Yes	Yes	65	90	4.61	0.64	6.78	193	1.47	0	7
###	2	18.75	male	married	high school	Yes	No	Yes	Yes	57	23	2.36	0.59	9.22	288	3.91	0	8
###	1	18.42	male	married	below	Yes	Yes	No	No	66	22.5	0.84	0.26	4.38	157	5.21	0	9
###	2	18.73	female	married	below	Yes	No	No	No	64	23	1.36	0.21	1.53	216	1.13	0	6
###	2	27.02	male	married	high school	Yes	No	Yes	Yes	62	41	2.94	0.52	7.49	223	2.55	0	9
###	2	22.67	female	married	below	Yes	No	No	No	74	84	1.46	0.32	3.32	166	2.27	1	34
###	2	26.22	male	married	below	No	No	Yes	Yes	57	58	3.29	0.38	4.76	188	1.45	0	6
###	3	22.15	male	married	below	No	No	Yes	Yes	61	76	1.08	0.41	6.57	124	6.08	0	17
###	2	22.89	female	unmarried, divorced and widowed	below	Yes	No	No	No	69	95	1.96	0.39	8.28	263	4.22	1	23
###	2	26.95	male	married	high school	Yes	No	No	No	74	32	2.56	0.61	2.98	132	1.16	0	6
###	1	29.59	male	married	below	Yes	No	Yes	No	56	32	3.64	0.61	5.78	253	1.59	0	10
###	2	16.26	male	married	high school	Yes	No	No	No	56	53	2.93	0.62	6.55	256	2.24	0	6
###	2	24.05	male	married	high school	Yes	No	Yes	No	75	25	2.02	0.41	2.47	190	1.22	0	4
###	3	27.94	male	married	below	Yes	Yes	No	No	62	48	0.78	0.38	3.62	129	4.64	0	9
###	2	27.01	male	married	below	Yes	No	No	Yes	69	37	0.91	0.33	2.63	109	2.89	0	6
###	2	27.01	female	married	below	Yes	No	No	No	50	35	1.39	0.19	3.86	210	2.78	0	8
###	2	18.03	female	unmarried, divorced and widowed	below	Yes	No	No	No	83	37	1.13	0.21	3.28	94	2.9	0	14
###	3	17.75	female	married	below	Yes	Yes	No	No	77	60	3.43	0.85	5.48	262	1.6	0	13
###	3	25.39	female	unmarried, divorced and widowed	below	No	No	Yes	Yes	89	104	1.86	0.43	4.98	173	2.68	1	22
###	3	19.63	male	married	below	No	No	Yes	Yes	79	75	3.85	0.58	5.04	179	1.31	0	5
###	3	23.18	male	married	above	No	No	Yes	Yes	68	96	0.77	0.45	2.97	126	3.86	0	9
###	2	19.68	male	married	below	Yes	No	Yes	Yes	66	27	1.17	0.41	4.27	133	3.65	0	14
###	2	21.1	male	married	below	Yes	Yes	No	No	76	31	0.61	0.44	4.93	121	8.08	0	13
###	2	17.19	female	married	below	Yes	No	No	No	54	32	1.49	0.28	3.8	212	2.55	0	5
###	2	21.21	male	married	high school	Yes	No	No	Yes	67	34	1.31	0.23	3.17	185	2.42	0	6
###	1	25.48	male	married	below	Yes	No	Yes	No	66	44	3.46	1.18	6.49	388	1.88	0	7
###	1	24.49	male	married	below	No	No	No	No	69	47	4.96	0.46	4.51	172	0.91	0	3
###	3	15.92	female	unmarried, divorced and widowed	below	Yes	No	No	No	69	63	1.04	0.27	3.83	131	3.68	1	22
###	1	15.92	male	married	below	No	No	Yes	Yes	57	43	3.04	0.4	4.04	198	1.33	0	5
###	3	28.54	male	married	below	No	No	No	No	68	84	1.13	0.41	6.83	70	6.04	0	9
###	3	18.96	male	married	above	No	No	Yes	Yes	48	60	1.18	0.7	8.7	167	7.37	0	13
###	2	20.08	male	married	below	Yes	No	Yes	No	63	44	1.62	0.5	5.89	195	3.64	0	15
###	1	19.34	male	married	high school	Yes	Yes	No	No	74	47	1.89	0.61	7.43	234	3.93	0	8
###	2	27.55	male	unmarried, divorced and widowed	below	Yes	No	Yes	Yes	68	23	1.74	0.49	4	178	2.3	0	7
###	1	23.12	male	married	below	Yes	No	Yes	Yes	57	34	1.91	0.27	3.12	113	1.63	0	3
###	2	23.46	male	married	below	Yes	No	Yes	Yes	38	40	3.1	0.38	6.53	188	2.11	0	2
###	2	23.53	male	married	below	No	No	No	Yes	42	60	0.97	0.28	9.35	228	9.64	0	11
###	2	23.93	male	married	below	Yes	Yes	Yes	Yes	72	40	2.03	0.48	4.31	219	2.12	0	5
###	3	24.22	male	married	high school	Yes	No	No	No	54	56	1.49	0.45	4.14	198	2.78	0	8
###	2	25.39	male	married	below	No	No	Yes	Yes	76	49	1.41	0.49	4.06	172	2.88	0	6
###	2	28.84	male	married	below	Yes	No	Yes	Yes	70	112	2.64	0.39	4.62	224	1.75	1	24
###	2	25	male	married	below	No	Yes	Yes	Yes	63	23	1.26	0.31	2.8	165	2.22	0	10
###	3	21.97	female	married	below	Yes	No	No	No	65	46	0.97	0.22	2.24	139	2.31	0	15
###	3	23.18	female	married	high school	Yes	No	No	No	59	37	1.84	0.37	2.25	162	1.22	0	10
###	2	24.56	male	married	above	Yes	No	Yes	Yes	34	69	3.47	0.69	7.41	299	2.14	1	29
###	1	27.66	female	married	below	Yes	No	No	No	67	17	1.63	0.41	3.75	143	2.3	0	7
###	3	21.08	male	married	below	No	No	Yes	Yes	45	58	6.38	0.73	5.56	161	0.87	0	12
###	3	21.19	male	married	below	No	No	Yes	No	81	60	3	0.31	5.41	113	1.8	0	7
###	2	23.59	male	married	below	Yes	No	Yes	Yes	75	32	1.85	0.61	2.48	132	1.34	0	5
###	1	32.54	female	married	high school	Yes	No	No	No	59	57.5	0.96	0.15	2.22	185	2.31	0	7
###	1	25.56	male	married	above	No	No	Yes	Yes	31	32	1.3	0.51	9.95	229	7.65	0	14
###	3	22.04	female	married	high school	Yes	No	No	No	60	32	0.98	0.33	3.78	170	3.86	0	9
###	2	18.89	male	married	below	Yes	No	Yes	Yes	73	60	2.24	0.23	4.62	210	2.06	0	5
###	1	24.97	male	married	below	No	No	Yes	No	36	46	2.38	0.45	3.39	230	1.42	0	9
###	3	23.95	female	married	below	Yes	No	No	No	58	30	2.5	0.41	4.21	343	1.68	0	6
###	1	29.17	male	married	below	Yes	No	Yes	No	73	40	0.89	0.17	1.44	116	1.62	0	14
###	2	19.04	male	married	below	No	No	Yes	No	71	36	0.42	0.33	7.41	279	17.64	0	15
###	3	22.86	male	unmarried, divorced and widowed	below	Yes	Yes	Yes	Yes	71	98	1.19	0.57	5.26	176	4.42	1	26
###	1	17.67	male	married	below	No	No	Yes	No	65	22	0.82	0.32	3.11	216	3.79	0	6
###	3	17.99	male	married	below	Yes	Yes	Yes	Yes	51	52	1.57	0.37	4.3	153	2.74	0	8
###	2	18.81	male	married	below	No	No	Yes	No	69	71	1.66	0.34	2.97	119	1.79	0	12
###	3	24.34	male	married	below	Yes	No	Yes	Yes	52	104	1.68	0.24	4.09	93	2.43	1	24
###	3	23.66	male	married	below	No	No	No	Yes	80	51	2.47	0.77	8.22	65	3.33	1	20
###	2	29.38	male	married	below	No	No	Yes	Yes	69	24	0.77	0.47	2.92	247	3.79	0	15
###	3	23.59	male	married	below	No	No	Yes	Yes	51	52	1.92	0.66	5.71	338	2.97	0	14
###	3	18.83	male	married	below	No	No	No	No	75	65	1.37	0.74	9.61	240	7.01	0	17
###	2	20.7	female	unmarried, divorced and widowed	below	Yes	No	No	No	68	16	1.1	0.28	6.69	130	6.08	0	19
###	2	21.97	male	married	below	No	No	Yes	No	66	47	0.92	0.51	3.72	132	4.04	0	10
###	1	27.92	male	married	below	Yes	No	Yes	Yes	67	35	1.05	0.6	8.04	233	7.66	0	14
###	3	20.76	male	married	high school	Yes	No	Yes	Yes	72	74	1.31	0.44	5.12	193	3.91	0	8
###	1	23.66	male	married	high school	No	No	Yes	Yes	53	23	1.75	0.27	4.38	167	2.5	0	11
###	1	24.26	male	married	above	No	No	Yes	Yes	57	41	3.86	0.44	8.07	302	2.09	0	5
###	3	13.24	female	married	below	Yes	No	No	No	56	64	1.79	0.55	6	205	3.35	1	28
###	3	26.4	female	married	below	Yes	Yes	Yes	No	67	121	1.62	0.33	5.92	253	3.65	1	22
###	1	26.61	male	married	below	Yes	No	Yes	Yes	67	32	2.28	0.62	8.6	256	3.77	0	6
###	2	15.62	male	married	below	No	No	Yes	Yes	46	42	1.82	0.34	2.56	224	1.41	0	9
###	2	22.68	male	married	high school	Yes	No	Yes	No	46	56	6.74	1.02	4.45	276	0.66	0	10
###	1	22.59	female	married	high school	No	No	No	No	70	29	1	0.89	7.19	158	7.19	0	17
###	2	21.96	male	married	below	No	No	Yes	No	51	34	2.62	0.48	4.55	192	1.74	0	4
###	3	16.41	male	married	below	Yes	No	No	No	60	84	0.39	0.27	6.64	112	17.03	1	28
###	1	23.18	male	married	below	Yes	No	Yes	Yes	58	20	1.32	0.19	3.99	195	3.02	0	6
###	3	17.58	male	married	below	No	Yes	Yes	Yes	66	91	1.07	0.18	3.82	174	3.57	1	22
###	2	20.55	male	married	below	No	No	Yes	Yes	62	55	2.65	0.49	8.91	231	3.36	0	10
###	1	24.57	male	married	below	No	No	Yes	Yes	69	21	1.01	0.37	4.14	130	4.1	0	10
###	3	23.44	female	unmarried, divorced and widowed	below	Yes	Yes	No	No	69	50	1.42	0.43	6.13	264	4.32	1	20
###	3	25.04	female	married	below	No	Yes	No	No	69	32	3.71	0.47	4.53	255	1.22	0	4
###	3	22.49	male	married	high school	Yes	No	No	No	69	76	1.43	0.51	3.83	158	2.68	0	6
###	2	24.39	male	unmarried, divorced and widowed	below	Yes	No	Yes	No	66	44	0.59	0.33	4.26	179	7.22	1	24
###	1	18.43	male	married	below	No	No	No	No	68	14	0.88	0.34	2.62	187	2.98	0	11
###	3	21.61	male	unmarried, divorced and widowed	below	No	Yes	No	No	68	42	1.46	0.46	3.35	160	2.29	0	7
###	3	23.81	male	married	high school	No	No	Yes	No	50	92	1.74	0.54	5.61	146	3.22	0	9
###	2	26.35	male	married	below	Yes	No	Yes	Yes	50	44	1.72	0.86	8.4	245	4.88	0	14
###	3	23.46	male	married	below	Yes	Yes	Yes	Yes	57	124	1.08	0.29	8.49	192	7.86	1	30
###	1	21.23	male	married	below	No	No	Yes	Yes	81	22	1.28	0.19	2.88	207	2.25	0	7
###	1	24.8	male	married	below	No	No	No	No	56	12	0.88	0.93	8.3	221	9.43	0	11
###	1	21.83	male	married	below	No	No	Yes	No	40	16	1.64	0.48	9.45	278	5.76	0	9
###	3	19.49	male	married	below	Yes	No	Yes	No	73	39	0.65	0.24	5.08	180	7.82	0	13
###	3	21.3	female	married	below	Yes	No	No	No	66	36	0.54	0.17	7.38	129	13.67	0	18
###	2	20.03	male	married	below	Yes	Yes	Yes	No	71	82	0.92	0.57	5.02	210	5.46	0	16
###	2	20.31	male	unmarried, divorced and widowed	below	Yes	No	Yes	Yes	45	46	1.57	0.67	6.95	204	4.43	0	7
###	2	28.23	male	married	below	Yes	No	Yes	Yes	69	88	2.58	0.32	2.94	137	1.14	0	6
###	2	23.88	male	married	high school	No	No	Yes	No	46	27	4.8	0.77	7.53	249	1.57	0	5
###	3	23.88	male	married	below	Yes	Yes	Yes	Yes	73	124	2.54	0.39	4.31	175	7.46	1	20
###	2	22.65	male	married	high school	No	Yes	Yes	Yes	50	44	3.8	0.53	4.82	194	1.27	0	5
###	1	21.71	female	married	below	Yes	No	Yes	No	60	18	2.14	0.47	5.72	267	2.67	0	10
###	2	21.53	male	married	below	Yes	No	No	No	52	33	1.97	0.58	2.4	279	1.22	0	10
###	3	23.05	male	married	above	Yes	No	No	Yes	54	32	1.46	0.29	3.01	270	2.06	0	11
